# Supplementary material for: Interactive toxicity effects of metronidazole, diclofenac, ibuprofen, and differently functionalized nanoplastics on marine algae Chlorella sp.
Source: Royal Society of Chemistry journal article supplement (doi:10.1039/d4em00780h), 2025-01-01
Supplement: d4em00780h1.pdf [file d4em00780h1.pdf]

1        **Interactive toxicity effects of metronidazole, diclofenac, ibuprofen, and**  
2        **differently functionalized nanoplastics on marine algae *Chlorella variabilis***

3

4

5

6

7

8

9

10

11

12

13

**Supplementary Information**

14 **Tables:**

15 **Table S1. Composition of Artificial Sea Water per 1000 ml**

16

| <b>Chemicals</b>                | <b>Grams</b> |
|---------------------------------|--------------|
| Sodium Chloride                 | 26.29        |
| Potassium chloride              | 0.74         |
| Calcium chloride                | 0.99         |
| Magnesium chloride              | 6.09         |
| Magnesium sulphate heptahydrate | 3.94         |

17

18 **Table S2. Preparation of Conway medium**

19 **Table S2.1 Preparation of stock 1 per 100 ml**

| <b>Chemicals</b>   | <b>Grams</b> |
|--------------------|--------------|
| Zinc chloride      | 2.1          |
| Cobalt chloride    | 2.0          |
| Ammonium molybdate | 0.9          |
| Copper sulphate    | 2.0          |

20

21 **Table S2.2 Preparation of stock 2 per 100ml**

| <b>Chemicals</b> | <b>Milligrams</b> |
|------------------|-------------------|
| Vitamin B12      | 10                |
| Vitamin B6       | 10                |

22

23 **Table S2.3 Preparation of stock 3 per L**

| <b>Chemicals</b>                      | <b>Grams</b> |
|---------------------------------------|--------------|
| Iron chloride hexahydrate             | 1.3          |
| Manganese chloride                    | 0.36         |
| Boric chloride                        | 33.6         |
| Ethylenediaminetetraacetic acid       | 45.0         |
| Sodium dihydrogen phosphate dehydrate | 20.0         |
| Sodium nitrate                        | 100          |

24

25

26

27

28

## 29 **Materials and Methods**

### 30 **Methods S1: Chemical used**

31 Metronidazole, Diclofenac sodium salts, Ibuprofen, and 2',7' -dichlorofluorescein diacetate  
32 (DCFH-DA) were purchased from Sigma Aldrich. Aminated (NH<sub>2</sub>) and carboxylated (COOH)  
33 polystyrene nanoplastics (600 nm) were purchased from Corpuscular, Inc, USA. DMSO  
34 (Dimethyl sulfoxide), Hydrogen peroxide (H<sub>2</sub>O<sub>2</sub>), and nitroblue tetrazolium (NBT) dye were  
35 purchased from SDFCL (Mumbai). Triton-X-100, Hydroxylamine hydrochloride,  
36 Trichloroacetic acid (TCA), and thiobarbituric acid (TBA) were purchased from Hi-Media Pvt.  
37 Ltd (Mumbai, India).

### 38 **Method S2: Determination of observed concentration of pharmaceutical products**

39 The observed concentration of PPs was determined using ultra-performance liquid  
40 chromatography (UPLC). The samples were filtered using a 0.22 µm filter before undergoing  
41 analysis. A C18 1.7µm (2.1 × 150 mm) column was utilized to separate and quantify all PPs. In  
42 the case of metronidazole, the mobile phase was isocratically eluted at a flow rate of 0.5 mL/min,  
43 consisting of water: acetonitrile (90:10, v/v) <sup>1</sup>. Similarly, for diclofenac, a mobile phase of 0.05  
44 M acetate buffer (pH 2.5) and acetonitrile (50:50, v/v) was employed with a flow rate of 0.5  
45 ml/min <sup>2</sup>. Likewise, the mobile phase for ibuprofen was a mixture of acetonitrile and water (pH 3  
46 adjusted by diluted acetic acid). The separation system comprised 50% acetonitrile and 50%  
47 H<sub>2</sub>O, with a flow rate of 0.2 mL/min <sup>3</sup>.

48

49

### 50 **Methods S3: Independent action modeling**

51 The expected toxicity ( $C_{Exp}$ ) of the mixture was determined by combining the individual  
52 toxicities of PPs and PSNPs using equation (1).

$$53 \quad C_{Exp} = P+N - (P*N/100) \quad (1)$$

54 In the equation, P and N represent the respective toxicity induced by PPs and PSNPs. Once  $C_{Exp}$   
55 is calculated, the ratio of inhibition ( $R_I$ ) is determined using the provided equation (2).

$$56 \quad R_I = \text{Observed Toxicity } (C_{Obs}) / \text{Expected Toxicity } (C_{Exp}) \quad (2)$$

57 Where  $C_{Obs}$  represent the observed toxicity resulting from the combination of PPs and  
58 PSNPs. The nature of the interaction is determined based on the computed value of  $R_I$ . If the  $R_I$   
59 value is equal to 1, the interaction is considered additive. If the calculated  $R_I$  value is less than 1,  
60 the interaction is deemed antagonistic. Conversely, if the  $R_I$  value obtained is greater than 1, the  
61 interaction is characterized as synergistic.

62 To validate the computed  $R_I$  value, statistical significance between  $C_{Obs}$  and  $C_{Exp}$  values  
63 was assessed using Two-way ANOVA (Bonferroni post-test). Despite the obtained  $R_I$  values, the  
64 interaction between PPs and PSNPs was regarded as additive when the toxicity difference  
65 between  $C_{Obs}$  and  $C_{Exp}$  was statistically insignificant ( $p > 0.05$ )<sup>4</sup>.

66

67

68

69

70

71 **Figures**

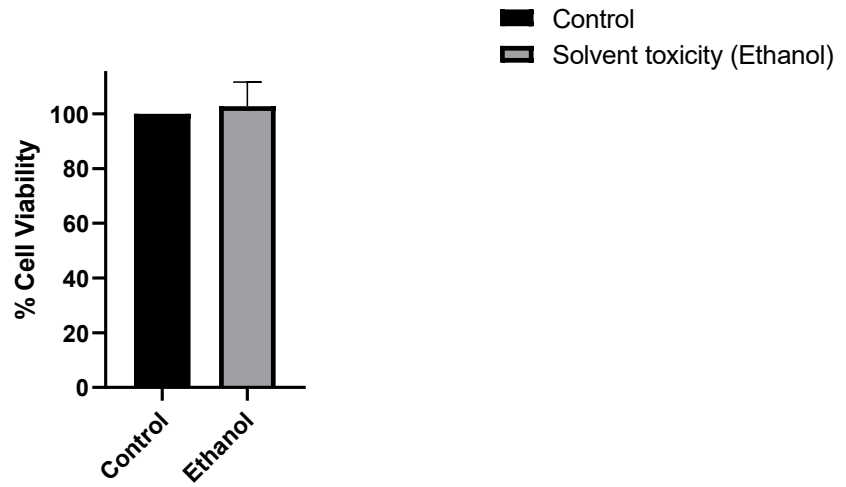

72

73 Fig. S1. Percentage cell viability on exposure to 0.05% of ethanol

74

75

76

77

78

79

80

81

82

83

84

85

86

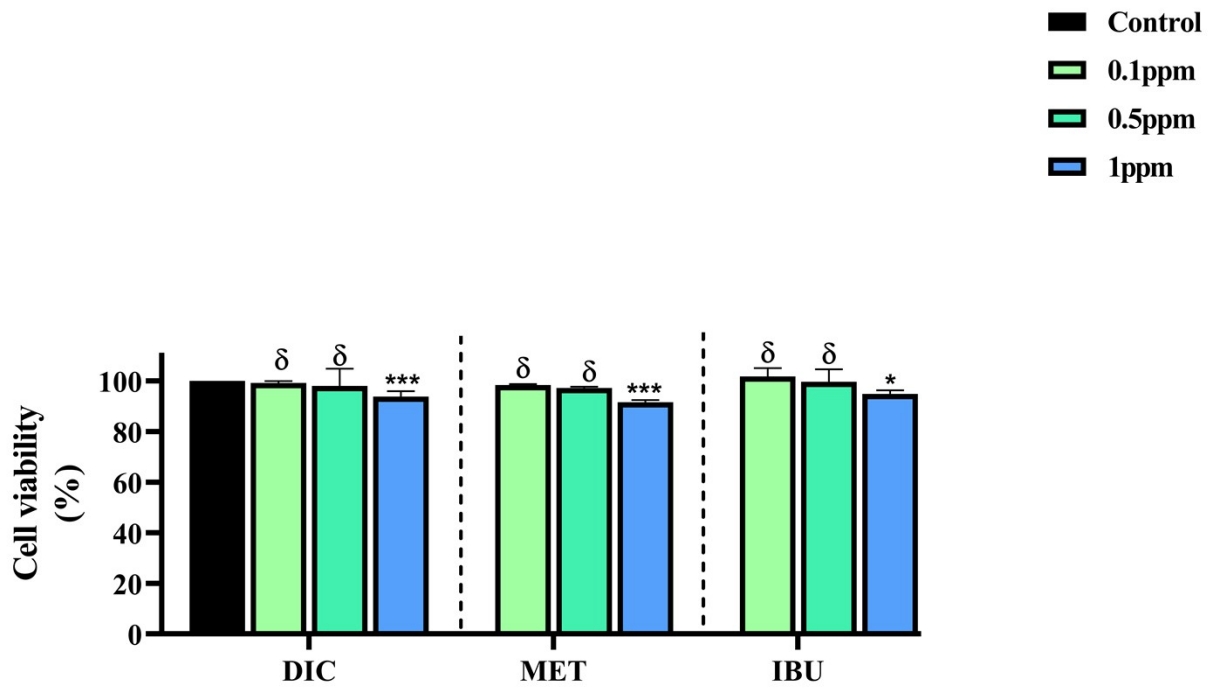

87

88 Fig. S2 Percentage cell viability of algal cells on exposure to metronidazole (MET), diclofenac  
 89 (DIC), and ibuprofen (IBU). Note: ‘\*’ represents the significant difference between the control  
 90 and test groups; δ represents no significance when compared to control group

91

92

93

94

95

96

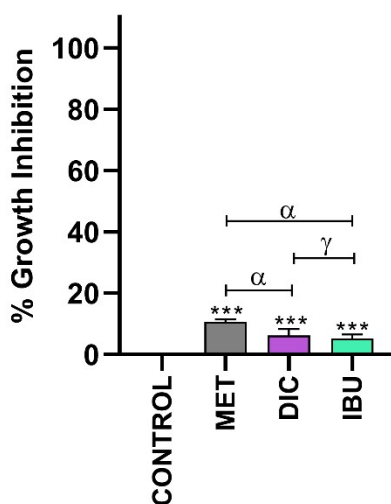

97

98 Fig. S3 Percentage growth inhibition of algal cells on exposure to metronidazole (MET),  
 99 diclofenac (DIC), and ibuprofen (IBU). Note: ‘\*’ represents the significant difference noted  
 100 between the control and test groups. The significant difference between the pristine NPs and the  
 101 binary mixtures of NPs with PPs are represented using ‘ $\alpha$ ,’ and ‘ $\gamma$ ’ ( $\alpha = p < 0.001$ ) and ( $\gamma = p <$   
 102 0.05)

103

104

105

106

107

108

109

110



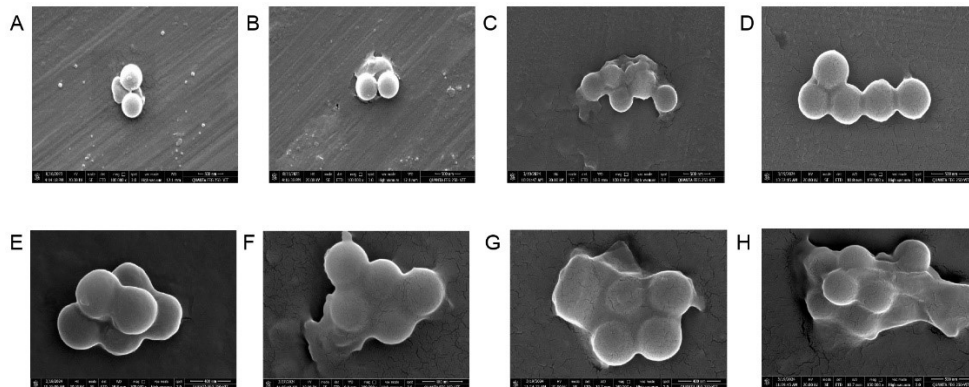

111

112

113 Fig. S4 FE-SEM images of (A) pristine NH<sub>2</sub> PSNPs; (B) pristine COOH PSNPs; (C)

114 combination of NH<sub>2</sub> PSNPs + MET; (D) NH<sub>2</sub> PSNPs + DIC; (E) NH<sub>2</sub> PSNPs + IBU; (F) COOH

115 PSNPs + MET; (G) COOH PSNPs + DIC; (H) COOH PSNPs + IBU

116

117

118

119

120

121

122

123

124

125

126

127

128

129

130

131

132

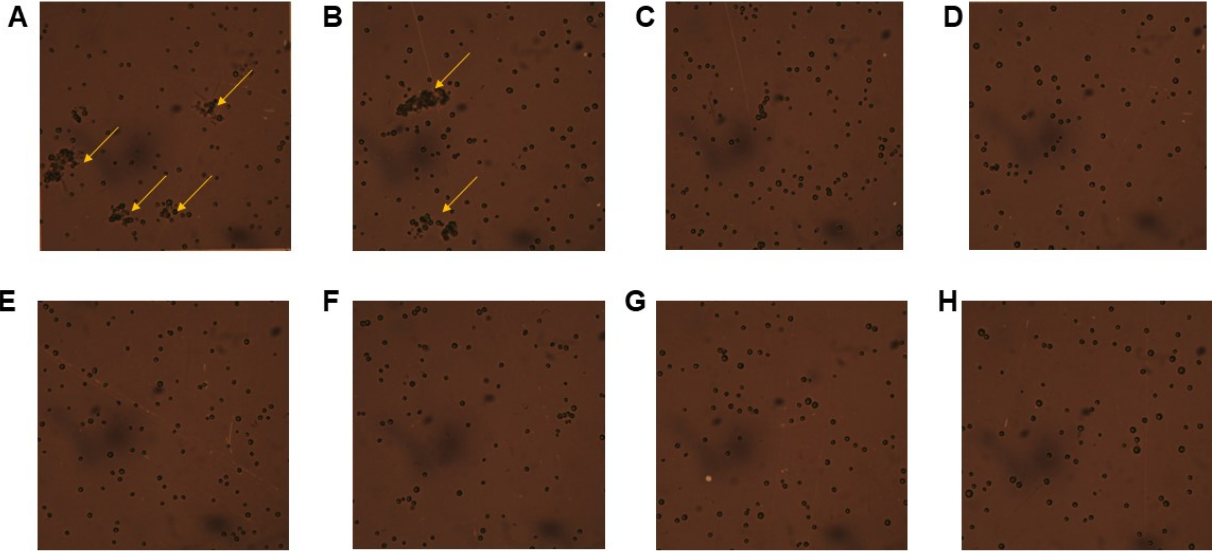

133

134

135 Fig. S5 Optical microscopy image of algal cells interacted with (A) pristine  $\text{NH}_2$  PSNPs; (B)  
136 pristine  $\text{COOH}$  PSNPs; (C) combination of  $\text{NH}_2$  PSNPs + MET; (D)  $\text{NH}_2$  PSNPs + DIC; (E)  
137  $\text{NH}_2$  PSNPs + IBU; (F)  $\text{COOH}$  PSNPs + MET; (G)  $\text{COOH}$  PSNPs + DIC; (H)  $\text{COOH}$  PSNPs +  
138 IBU

139

140

141

142

143

144

145

146

147

148

149

150

151 **References**

152

- 153 1 G. A. Soares, G. S. Rodrigues, L. P. Buranello, R. B. de Oliveira and J. R. de Arruda Miranda,  
154 Pharmacomagnetography assessment of the prokinetic effect on metronidazole absorption, *Journal*  
155 *of Pharmacy and Pharmacology*, 2023, rgad088.
- 156 2 E. M. Elzayat, M. F. Ibrahim, A. A. Abdel-Rahman, S. M. Ahmed, F. K. Alanazi and W. A.  
157 Habib, A validated stability-indicating UPLC method for determination of diclofenac sodium in its  
158 pure form and matrix formulations, *Arabian Journal of Chemistry*, 2017, **10**, S3245–S3254.
- 159 3 A. A. Ahmed-Anwar, M. A. Mohamed, A. A. Farghali, R. Mahmoud and M. E. M. Hassouna,  
160 Green UPLC method for estimation of ciprofloxacin, diclofenac sodium, and ibuprofen with  
161 application to pharmacokinetic study of human samples, *Sci Rep*, 2023, **13**, 17613.
- 162 4 V. Thiagarajan, V. Iswarya, A. J. P., R. Seenivasan, N. Chandrasekaran and A. Mukherjee,  
163 Influence of differently functionalized polystyrene microplastics on the toxic effects of P25 TiO<sub>2</sub>  
164 NPs towards marine algae *Chlorella* sp., *Aquatic Toxicology*, 2019, **207**, 208–216.

165

166
